# Supplementary material for: Evaluation of Lignocellulosic Wastewater Valorization with the Oleaginous Yeasts R. kratochvilovae EXF7516 and C. oleaginosum ATCC 20509
Source: MDPI journal article supplement (doi:10.3390/fermentation8050204), 2022-04-30
Supplement: s1 [file s1]

## Supplementary data

Evaluation of lignocellulosic wastewater valorization with the oleaginous yeasts *R.*

*kratochvilovae* EXF7516 and *C. oleaginosum* ATCC 20509

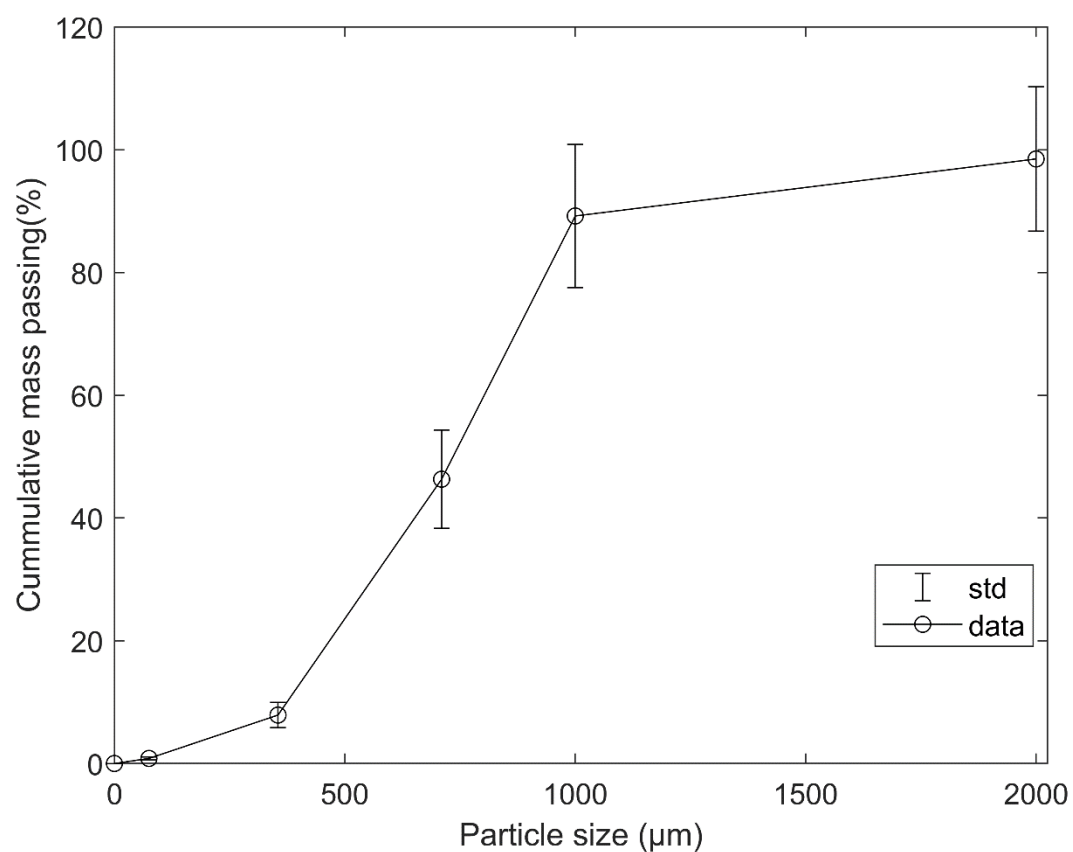

**Figure. S1.** Cumulative percentage wood passing through the sieves
